# Supplementary material
Source: ML conference proceedings conference paper supplement (https://openreview.net/forum?id=n3armuTFit)
Supplement: supplementary_material [file NeurIPS2025_Orient_Anything_v2.pdf › NeurIPS2025_Orient_Anything_v2.pdf]

## 1 A More Visualizations of Images in The Wild

2 In 1 2, 3, 4, 5, 6, 7, we present more visualizations of images from various domains containing  
3 different objects. In these images, our model shows strong abilities in single-view absolute orientation  
4 estimation, powerful object horizontal rotational symmetry recognition and two-frame object relative  
5 pose rotation estimation, further highlighting the impressive zero-shot capability of Orient Anything  
6 V2.

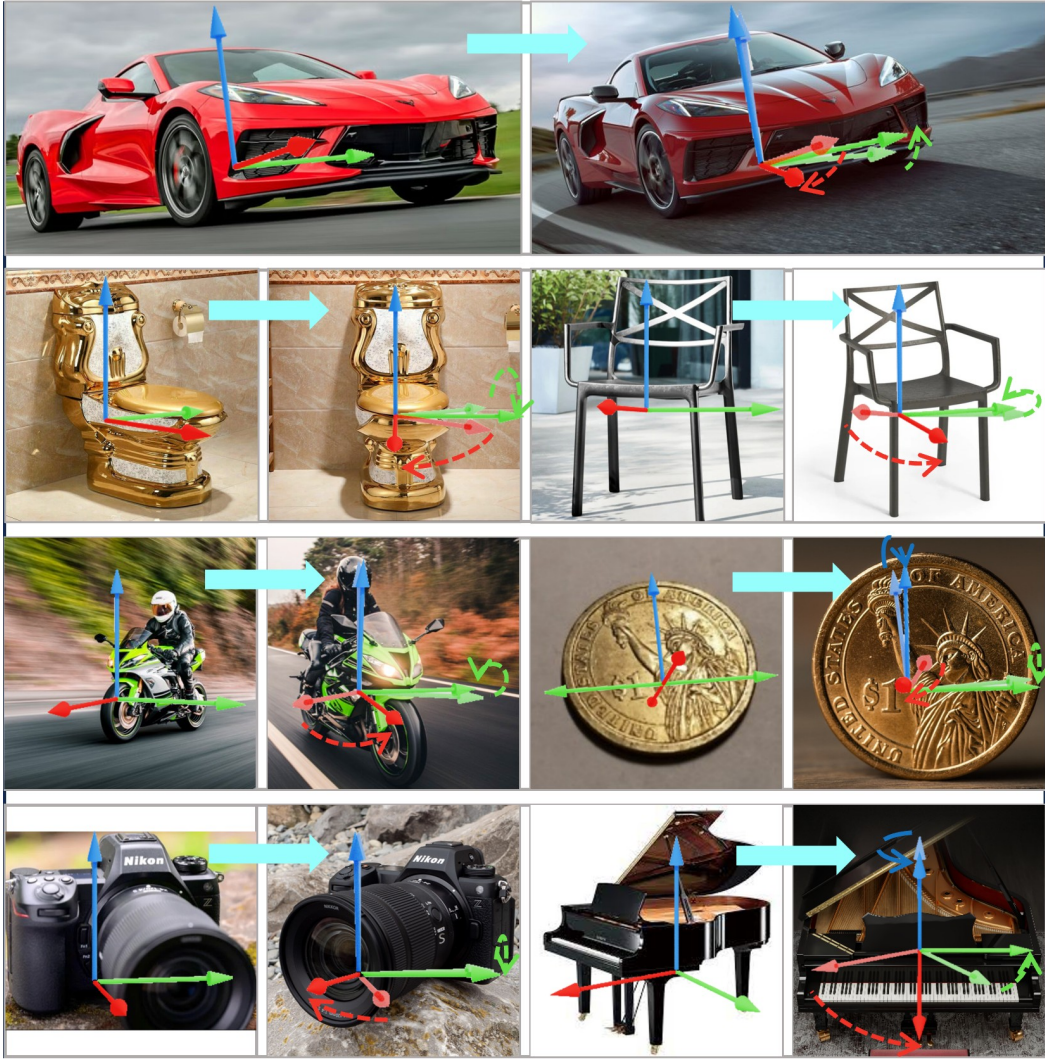

Figure 1: Relative pose rotation estimation for images in the wild.

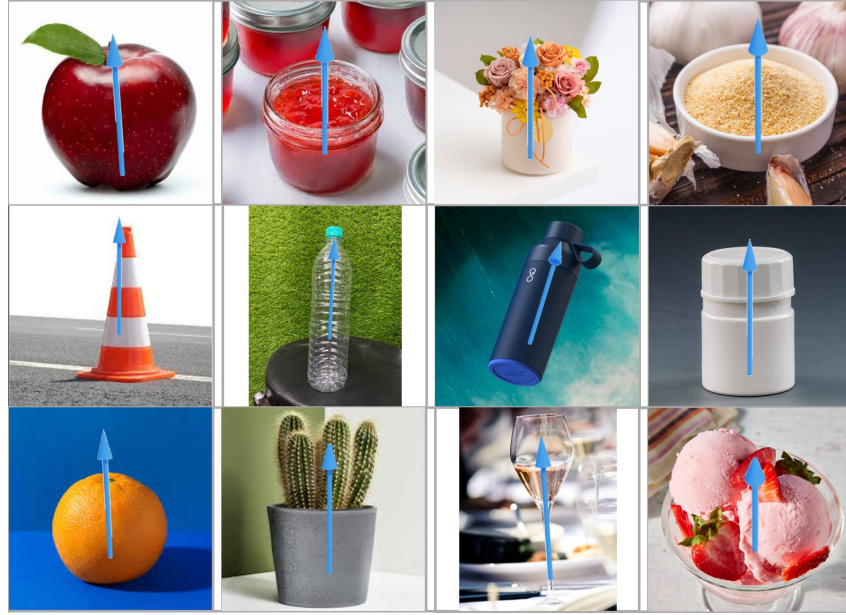

Figure 2: Orientation estimation and Rotational symmetry recognition results on objects has no front direction.

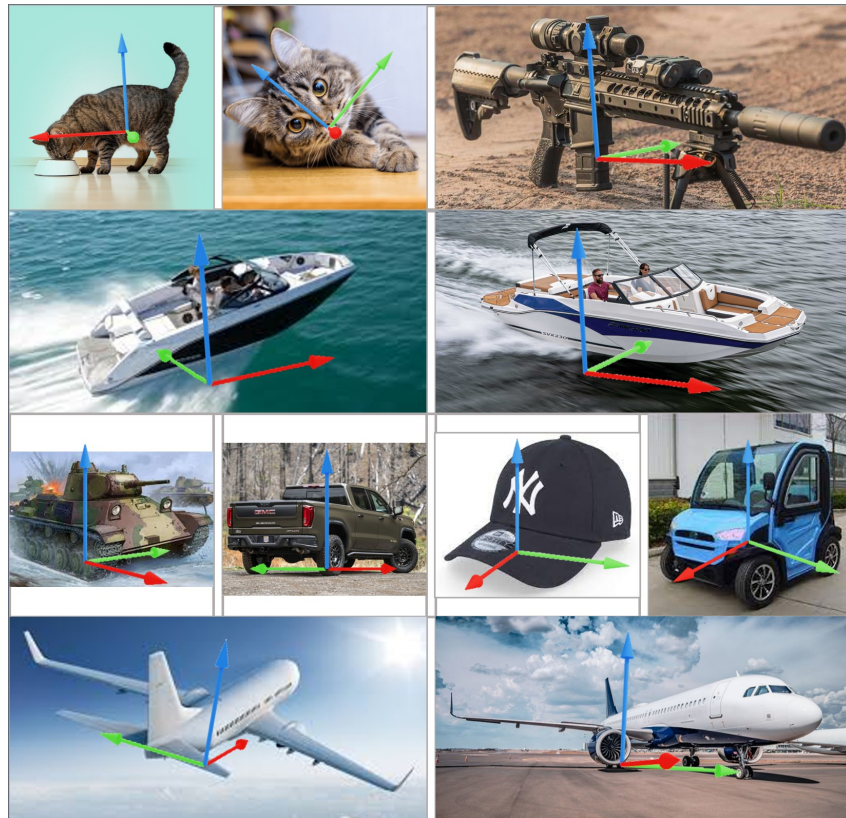

Figure 3: Orientation estimation and Rotational symmetry recognition results on objects has one front direction. Part 1.

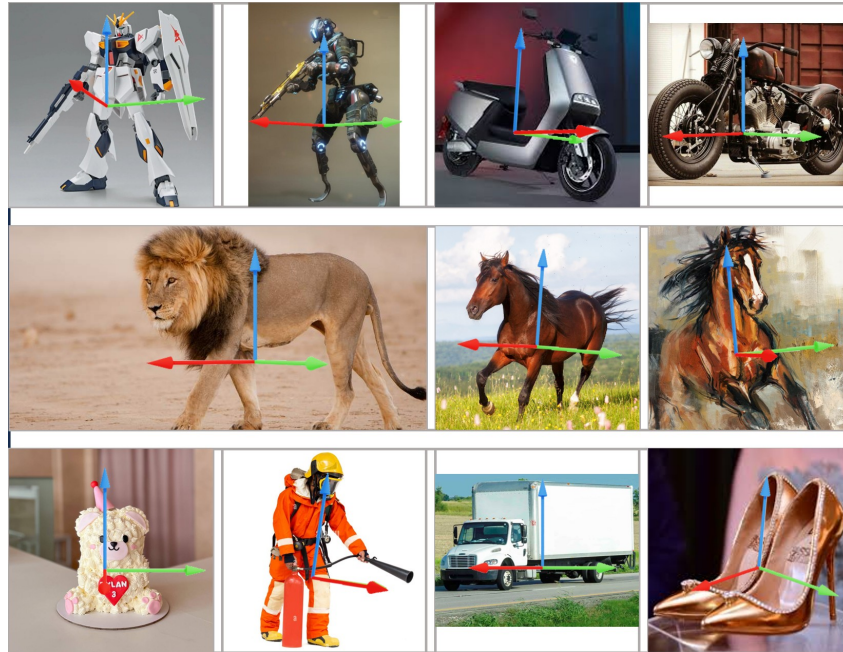

Figure 4: Orientation estimation and Rotational symmetry recognition results on objects has one front direction. Part 2.

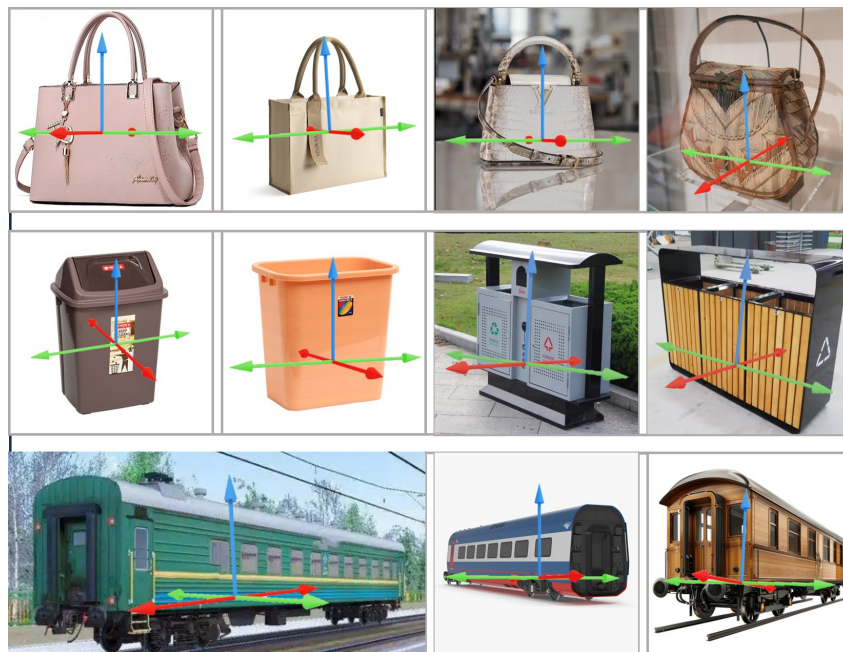

Figure 5: Orientation estimation and Rotational symmetry recognition results on objects has two front direction. Part 1.

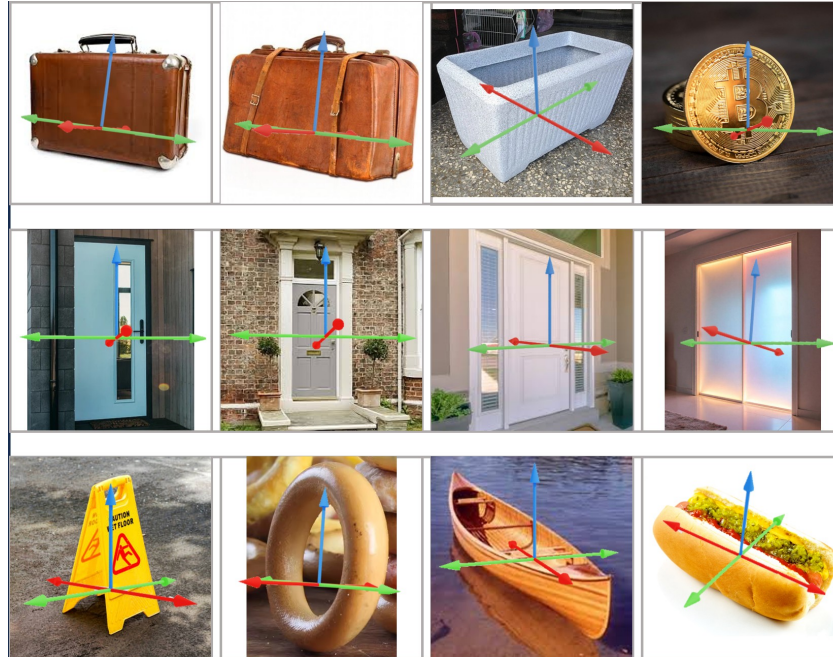

Figure 6: Orientation estimation and Rotational symmetry recognition results on objects has two front direction. Part 2.

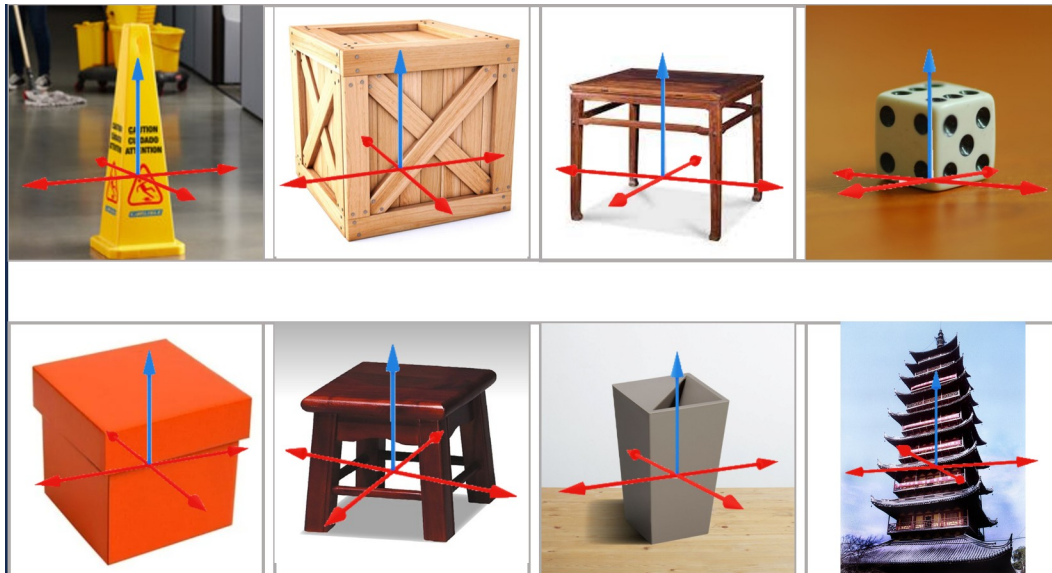

Figure 7: Orientation estimation and Rotational symmetry recognition results on objects has four front direction.
